# Supplementary material for: Bacterial Populations in International Artisanal Kefirs
Source: PubMed Central journal article supplement (PMC7565184; doi:10.3390/microorganisms8091318), 2020-08-29
Supplement: microorganisms-08-01318-s001.pdf [file microorganisms-08-01318-s001.pdf]

## Supplementary Materials

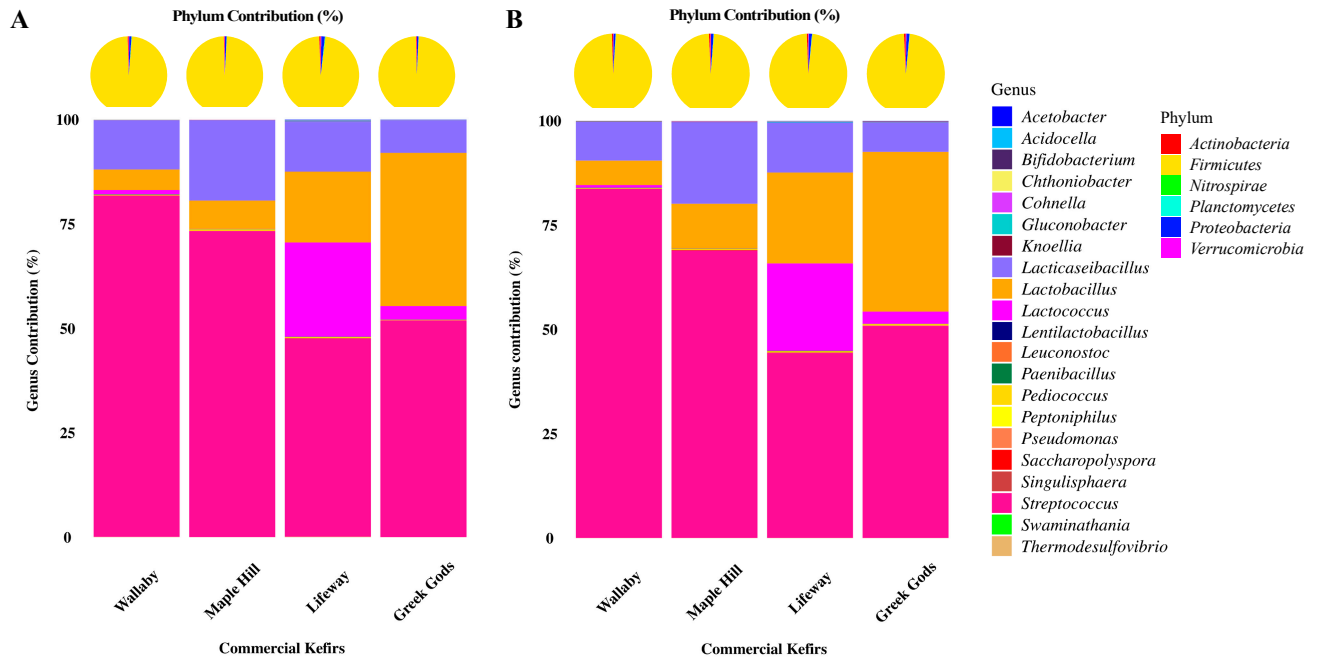

**Figure S1.** Relative abundances of bacterial phylum (Pie charts) and an aggregation of the 21 most abundant bacterial genera (column charts) for the V1–V3 (A) and V3–V4 (B) regions of 16S rRNA genes. Commercial kefir controls: Lifeway (plain), The Greek Gods (plain), Wallaby (organic plain), and Maple Hill (organic plain).
